# Supplementary material
Source: publisher figshare collection journal article supplement (https://frontiersin.figshare.com/ndownloader/files/25278920)
Supplement: Supplementary file 1 [file 25278920]

Snapshot of peptidomics of the red tide forming species *Noctiluca scintillans*

**Shuwen Zhang1†, Cheng LI2†, Shunyan Cheung3, Mingming Sun2, Shuqun Song4, Wang Guo2, Cui Guo5,6, Gongguo Wu2, Hongbin Liu3,7***

1Guangdong Provincial Key Laboratory of Healthy and Safe Aquaculture, College of Life Science, South China Normal University, West 55 of Zhongshan Avenue, Guangzhou 510631, PR China

2Division of Life Science, The Hong Kong University of Science and Technology, Clear Water Bay, Kowloon, Hong Kong SAR, China

3Depeatment of Ocean Science, The Hong Kong University of Science and Technology, Clear Water Bay, Kowloon, Hong Kong SAR, China

4Key Lab of Marine Ecology and Environmental Sciences,Institute of Oceanology, Chinese Academy of Sciences, Qingdao 266003, PR China

5College of Marine Life Sciences, Ocean University of China, Qingdao 266003, China;

6Institute of Evolution and Marine Biodiversity, Ocean University of China, Qingdao 266003, China

7Hong Kong Branch of Southern Marine Science & Engineering Guangdong Laboratory, The Hong Kong University of Science and Technology, Hong Kong, China

***Corresponding author:**

Hongbin Liu

Tel: +852-2358-7341; Fax: +852-2358-7323; E-mail: liuhb@ust.hk

**Running title: Peptidomics of *Noctiluca***

**Keywords: *Noctiluca scintillans*, peptidomics, mass spectrometry, protein, food digestion**

Supplemetary Figure S1. SCX fraction profiles of *Noctiluca scintillans* extracts from initition and peak phase. A: 3 Kda cut-off filtration. Grey curve, initiation phase; Red curve, peak phase. B: 10 Kda cut-off filtration. Blue curve: initiation phase; Red curve: peak phase.


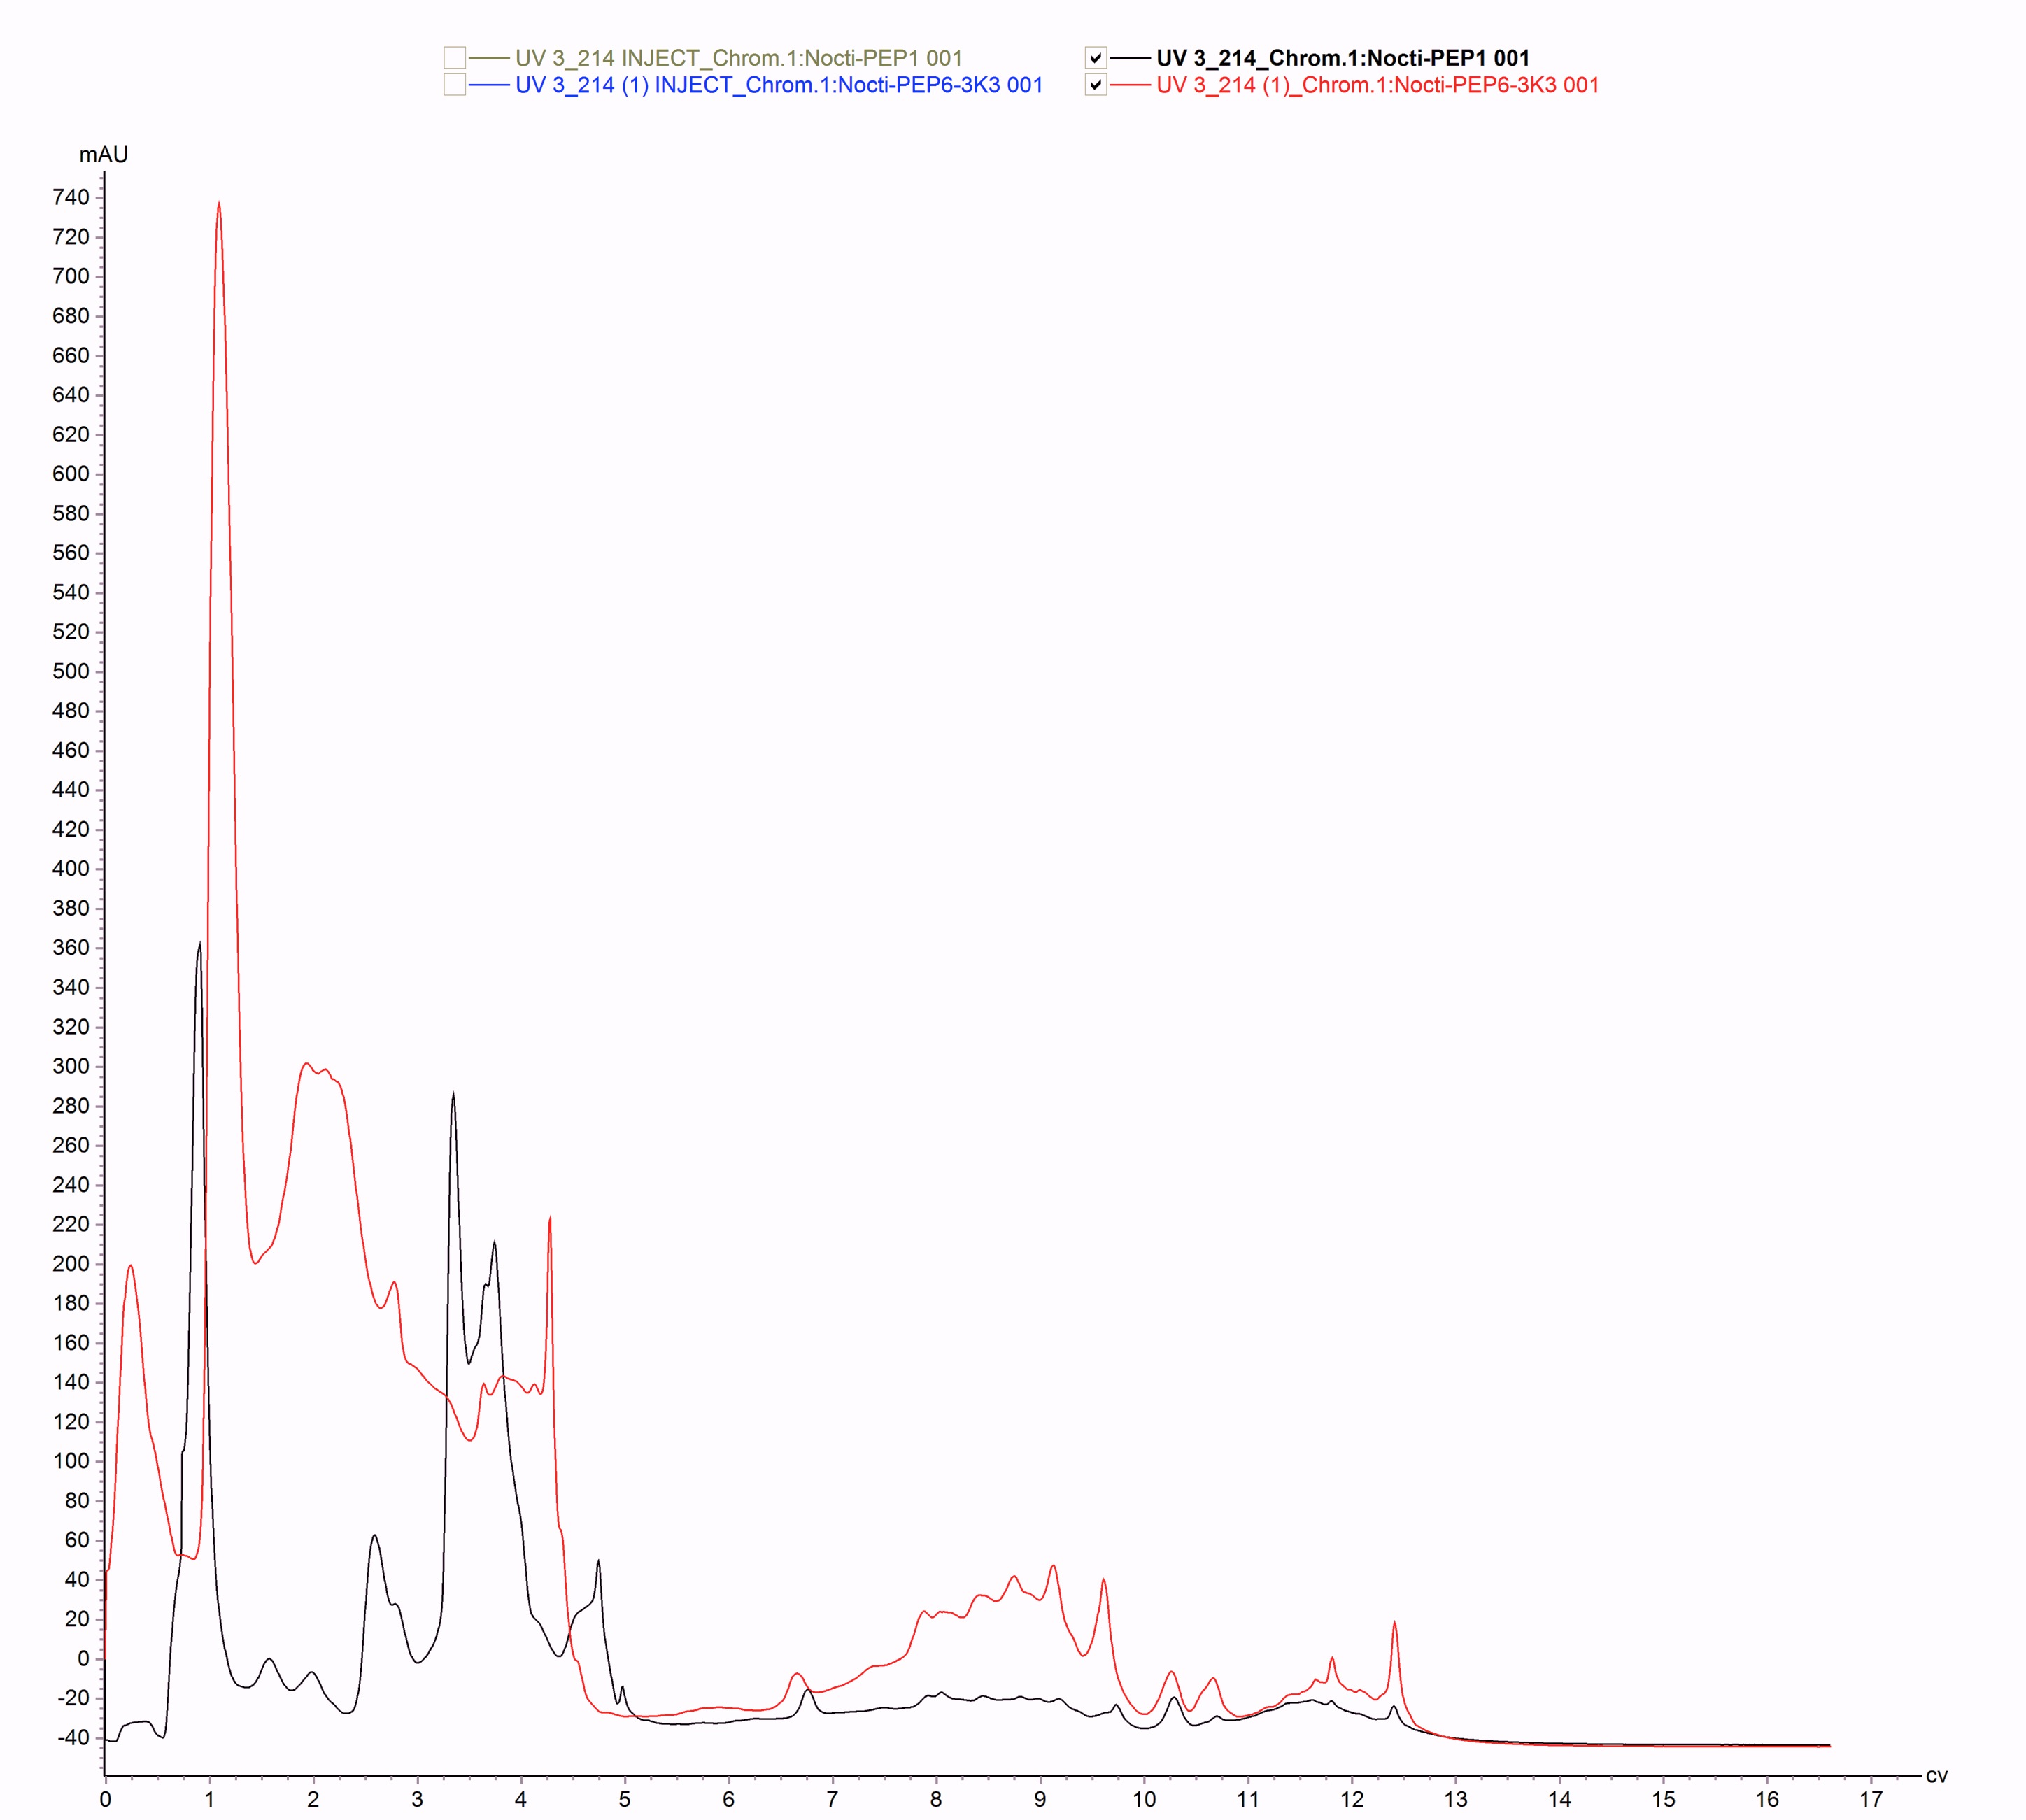


A


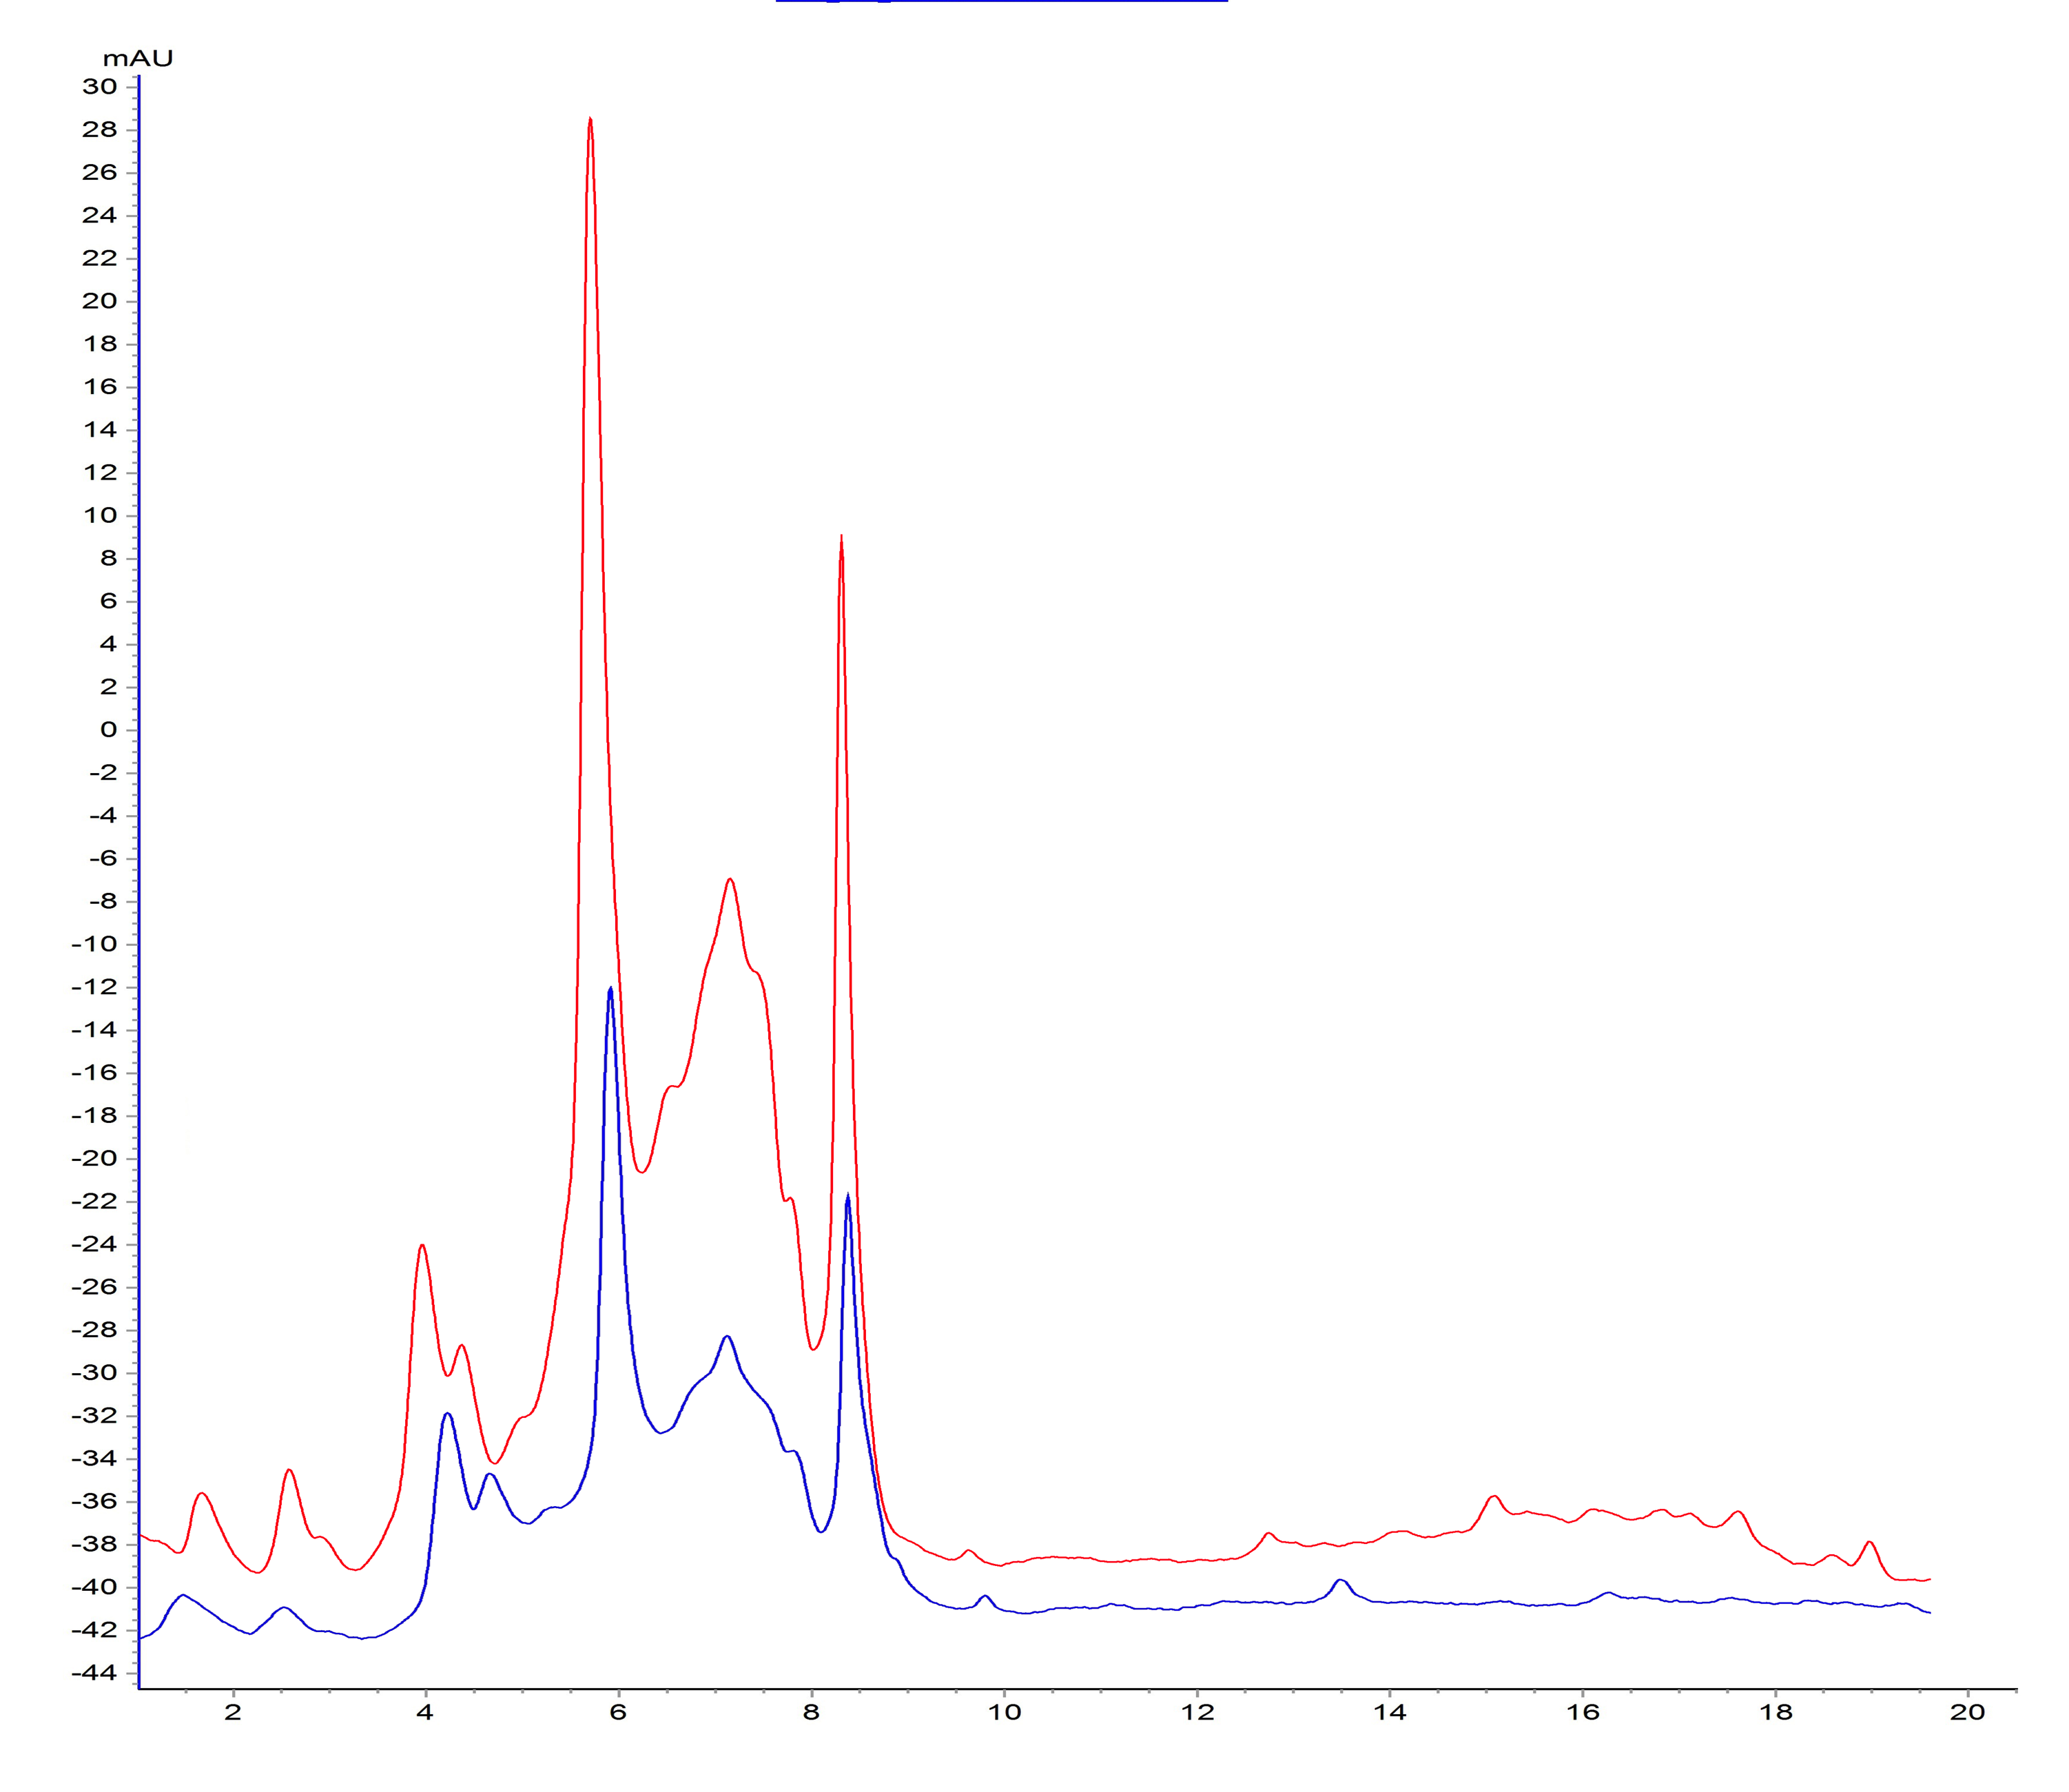


B
